# Supplementary material for: Retinal Pigment Epithelium and Photoreceptor Preconditioning Protection Requires Docosanoid Signaling
Source: PubMed Central journal article supplement (PMC5882642; doi:10.1007/s10571-017-0565-2), 2017-11-24

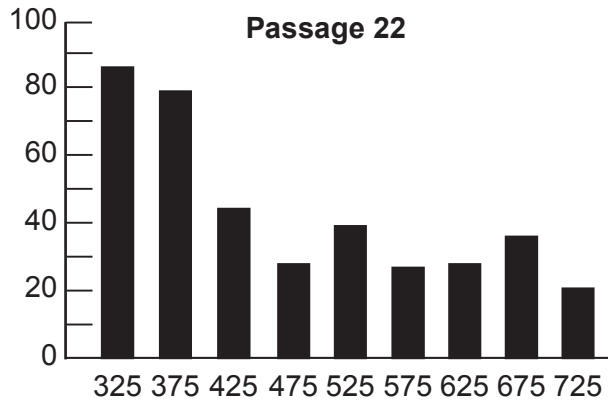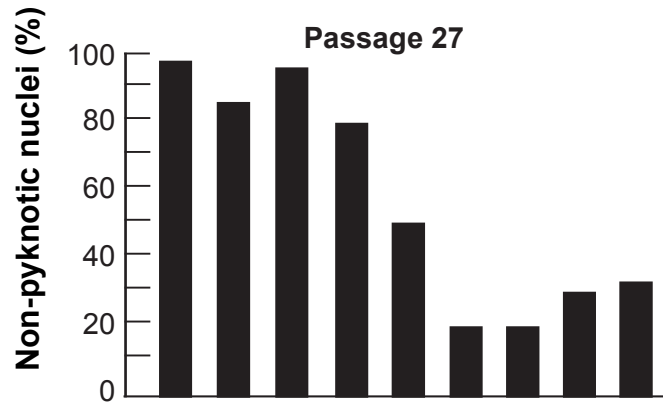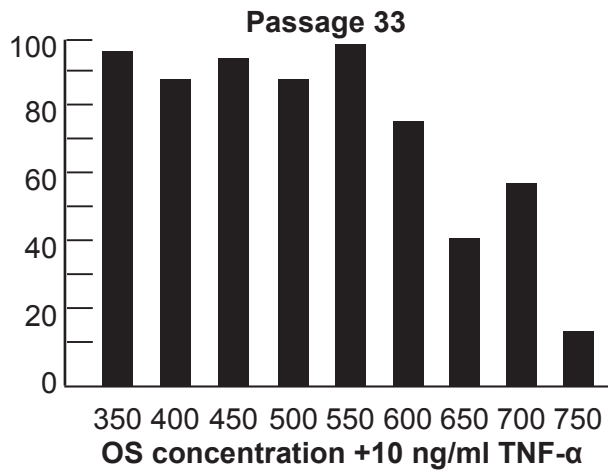

Supplement: 10571_2017_565_MOESM2_ESM.pdf [file 10571_2017_565_MOESM2_ESM.pdf]
