# Supplementary material for: Retinal Pigment Epithelium and Photoreceptor Preconditioning Protection Requires Docosanoid Signaling
Source: PubMed Central journal article supplement (PMC5882642; doi:10.1007/s10571-017-0565-2), 2017-11-24
Supplement: 10571_2017_565_MOESM4_ESM.pdf [file 10571_2017_565_MOESM4_ESM.pdf]

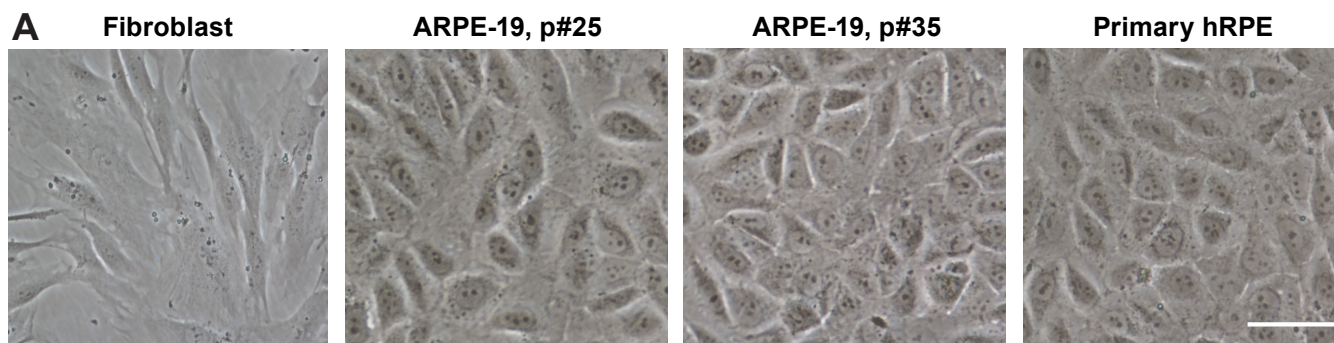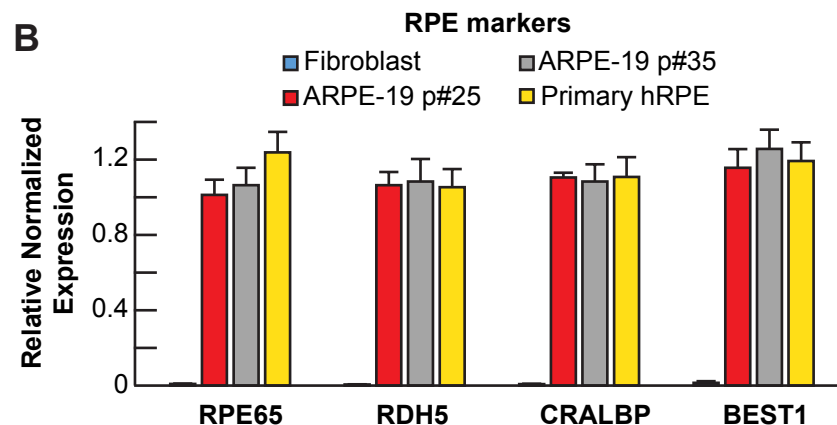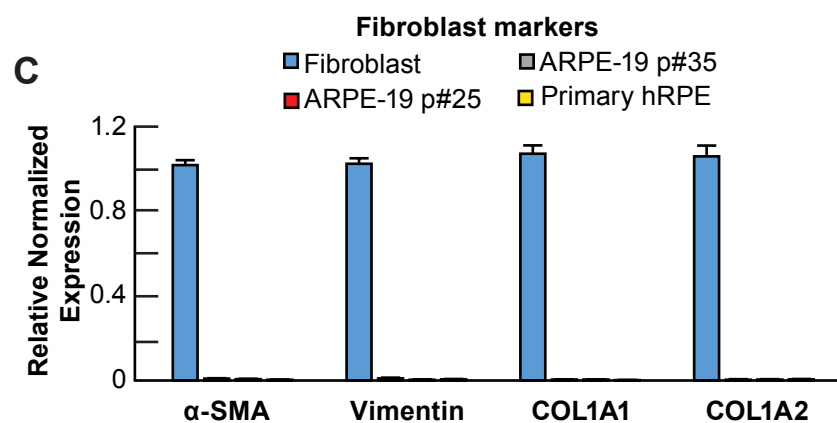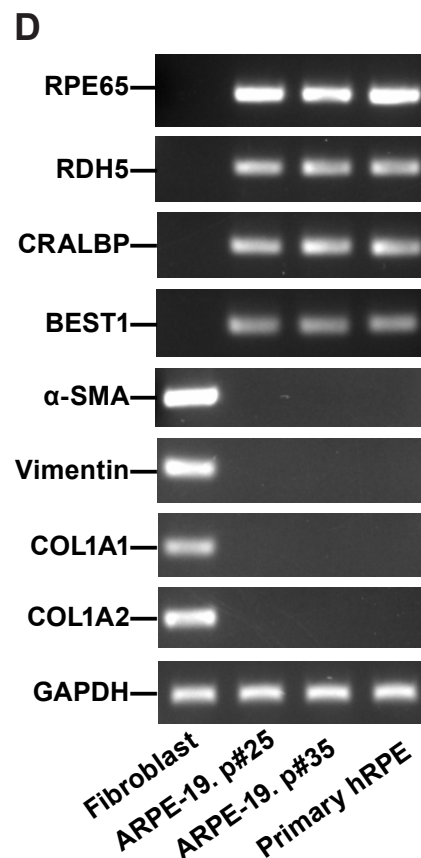

**E**

| Human Gene                               | Abbreviation | Primer | Sequence                   |
|------------------------------------------|--------------|--------|----------------------------|
| Retinoid Isomerohydrolase                | RPE65        | F      | CAATGGGTTTCTGATTGTGGA      |
|                                          |              | R      | CCAGTTCTCACGTAATTGGCTA     |
| Retinol Dehydrogenase 5                  | RDH5         | F      | TGGGTGGAGATGCACGTTAAG      |
|                                          |              | R      | GTGTGGGTCCGATGATACCAG      |
| Cellular Retinaldehyde-Binding Protein   | CRALBP       | F      | CAAAGCCATCCACTTCATCCACCA   |
|                                          |              | R      | AAGTCAGAGGGCAGGATGTTCTCA   |
| Bestrophin 1                             | BEST1        | F      | CCTTTATGGGCTCCACCTTCAACATC |
|                                          |              | R      | CAGTAGTTTGGTCTTGAGTTTGCC   |
| Alpha smooth muscle actin                | α-SMA        | F      | GTGTTGCCCTGAAGAGCAT        |
|                                          |              | R      | GCTGGGACATTGAAAGTCTCA      |
| Vimentin                                 | VIM          | F      | TCTCTGAGGCTGCCAACCG        |
|                                          |              | R      | CGAAGGTGACGAGCCATTTC       |
| Collagen Type I Alpha 1 Chain            | COL1A1       | F      | CGGTGTGACTCGTGCAGC         |
|                                          |              | R      | ACAGCCGCTTCACCTACAGC       |
| Collagen Type I Alpha 2 Chain            | COL1A2       | F      | GTTGCTGCTTGACAGTAACCTT     |
|                                          |              | R      | AGGCCAAGTCCAACCTCTT        |
| Glyceraldehyde-3-Phosphate Dehydrogenase | GAPDH        | F      | TGGACCTGACCTGCCGTCTA       |
|                                          |              | R      | CCCTGTTGCTGTAGCCAAATTC     |
